# Supplementary material for: Pregnancy outcomes in women with aortic coarctation
Source: PubMed Central journal article supplement (PMC7873427; doi:10.1136/heartjnl-2020-317513), 2020-10-29
Supplement: heartjnl-2020-317513supp001.pdf [file heartjnl-2020-317513supp001.pdf]

**SUPPLEMENTARY FILE****Supplementary table S1** Baseline characteristics of women with repaired coarctation versus women with unrepaired coarctation

|                                             | <b>Total cohort<br/>(n=303)</b> | <b>Repaired CoA<br/>(n=274)</b> | <b>Unrepaired CoA<br/>(n=29)</b> | <b>P-value</b> |
|---------------------------------------------|---------------------------------|---------------------------------|----------------------------------|----------------|
| <b>Demographics</b>                         |                                 |                                 |                                  |                |
| Age (mean, SD)                              | 29.9 (5.3)                      | 29.9 (5.4)                      | 29.7 (4.8)                       | 0.311          |
| Nulliparity (%)                             | 155 (51.2)                      | 139 (50.7)                      | 16 (55.2)                        | 0.649          |
| BMI (median, IQR)                           | 23.3 (21.4-27.4)                | 23.4 (21.5-27.4)                | 22.3 (19.9-25.7)                 | 0.177          |
| Emerging country (%)                        | 63 (20.8)                       | 50 (18.2)                       | 13 (44.8)                        | <b>0.001</b>   |
| <b>Pre-pregnancy characteristics</b>        |                                 |                                 |                                  |                |
| Current smoker (%)                          | 9 (3.6)                         | 8 (3.6)                         | 1 (4)                            | 0.917          |
| Hypertension (%)                            | 81 (27.1)                       | 71 (26.2)                       | 10 (35.7)                        | 0.281          |
| Diabetes mellitus (%)                       | 6 (2)                           | 6 (2.3)                         | 0 (0)                            | 0.413          |
| Atrial fibrillation (%)                     | 1 (0.3)                         | 1 (0.4)                         | 0 (0)                            | 0.745          |
| Signs of heart failure (%)                  | 8 (2.6)                         | 7 (2.6)                         | 1 (3.4)                          | 0.778          |
| LVEF <40% (%)                               | 7 (2.3)                         | 6 (2.2)                         | 1 (3.4)                          | 0.668          |
| Cardiac medication use before pregnancy (%) | 127 (41.9)                      | 115 (42)                        | 12 (41.4)                        | 0.951          |
| Beta blocker                                | 37 (12.2)                       | 37 (13.5)                       | 0 (0)                            | <b>0.035</b>   |
| ACE-inhibitor                               | 9 (3.0)                         | 8 (2.9)                         | 1 (3.4)                          | 0.873          |
| Calcium channel blocker                     | 2 (0.7)                         | 11 (4.0)                        | 0 (0)                            | 0.272          |
| Diuretics                                   | 11 (3.6)                        | 2 (0.7)                         | 0 (0.0)                          | 0.644          |
| NYHA class I (%)                            | 266 (87.8)                      | 243 (88.7)                      | 23 (79.3)                        | 0.143          |
| NYHA class II (%)                           | 31 (10.2)                       | 25 (9.1)                        | 6 (20.7)                         | 0.051          |

|                               |            |            |          |              |
|-------------------------------|------------|------------|----------|--------------|
| NYHA class III (%)            | 3 (1)      | 3 (1.1)    | 0 (0)    | 0.571        |
| NYHA class IV (%)             | 0 (0)      | 0 (0)      | 0 (0)    | n.a.         |
| Bicuspid aortic valve (%)     | 123 (40.6) | 114 (41.6) | 9 (31)   | 0.270        |
| Ventricular septal defect (%) | 37 (12.2)  | 35 (12.8)  | 2 (6.9)  | 0.358        |
| Persistent arterial duct (%)  | 17 (5.6)   | 16 (5.8)   | 1 (3.4)  | 0.595        |
| Aortic dilatation >40mm (%)   | 11 (3.6)   | 11 (4.0)   | 0 (0)    | 0.272        |
| Valve replacement (%)         | 15 (5)     | 15 (5.5)   | 0 (0)    | 0.196        |
| Aortic stenosis (%)           | 33 (10.9)  | 29 (10.6)  | 4 (13.8) | 0.598        |
| Mild                          | 20 (6.6)   | 17 (6.2)   | 3 (10.3) |              |
| Moderate                      | 13 (4.3)   | 12 (4.4)   | 1 (3.4)  |              |
| Severe                        | 0 (0)      | 0 (0)      | 0 (0)    |              |
| Aortic regurgitation (%)      | 62 (17.3)  | 49 (18)    | 3 (10.3) | 0.201        |
| Mild                          | 40 (13.3)  | 39 (14.3)  | 1 (3.4)  |              |
| Moderate                      | 12 (4)     | 10 (3.7)   | 2 (6.9)  |              |
| Severe                        | 0 (0)      | 0 (0)      | 0 (0)    |              |
| Mitral stenosis (%)           | 4 (1.3)    | 4 (1.5)    | 0 (0)    | 0.511        |
| Mitral regurgitation (%)      | 52 (17.4)  | 44 (16.2)  | 8 (27.6) | <b>0.045</b> |
| Mild                          | 47 (15.7)  | 41 (15.1)  | 6 (20.7) |              |
| Moderate                      | 5 (1.7)    | 3 (1.1)    | 2 (6.9)  |              |
| Severe                        | 0 (0)      | 0 (0)      | 0 (0)    |              |

P-values were calculated between the groups repaired and unrepaired coarctation, using chi-square tests and Mann-Whitney tests where appropriate. CoA: aortic coarctation. IQR: inter-quartile range. BMI: body mass index, in kg/m<sup>2</sup>. LVEF: left ventricular ejection fraction. ACE-inhibitor: angiotensin-converting enzyme inhibitor. NYHA class: New York Heart Association Functional Classification.

**Supplementary table S2** Baseline characteristics of women with bicuspid aortic valve versus women without bicuspid aortic valve.

|                                             | <b>Total cohort<br/>(n=303)</b> | <b>BAV (n=123)</b> | <b>No BAV (n=180)</b> | <b>P-value</b> |
|---------------------------------------------|---------------------------------|--------------------|-----------------------|----------------|
| <b>Demographics</b>                         |                                 |                    |                       |                |
| Age (median, IQR)                           | 30.4 (26.4-33.8)                | 30.3 (25.8-33.9)   | 30.4 (26.6-33.8)      | 0.709          |
| Nulliparity (%)                             | 155 (51.2)                      | 62 (50.4)          | 93 (51.7)             | 0.829          |
| BMI (median, IQR)                           | 23.3 (21.4-27.4)                | 23.4 (21.5-27.8)   | 23.1 (21.2-27.3)      | 0.395          |
| Emerging country (%)                        | 63 (20.8)                       | 28 (22.8)          | 35 (19.4)             | 0.484          |
| <b>Pre-pregnancy characteristics</b>        |                                 |                    |                       |                |
| Current smoker (%)                          | 9 (3.6)                         | 4 (3.9)            | 5 (3.4)               | 0.837          |
| Hypertension (%)                            | 81 (27.1)                       | 30 (24.6)          | 51 (28.8)             | 0.419          |
| Diabetes mellitus (%)                       | 6 (2)                           | 2 (1.7)            | 4 (2.3)               | 0.719          |
| Atrial fibrillation (%)                     | 1 (0.3)                         | 0 (0)              | 1 (0.8)               | 0.226          |
| Signs of heart failure (%)                  | 8 (2.6)                         | 3 (2.4)            | 5 (2.8)               | 0.851          |
| LVEF <40% (%)                               | 7 (2.3)                         | 1 (0.8)            | 6 (3.3)               | 0.152          |
| Cardiac medication use before pregnancy (%) | 127 (41.9)                      | 53 (43.1)          | 74 (41.1)             | 0.732          |
| Beta blocker                                | 33 (10.9)                       | 20 (11.1)          | 13 (10.6)             | 0.882          |
| ACE-inhibitor                               | 4 (1.3)                         | 4 (3.3)            | 0 (0.0)               | <b>0.015</b>   |
| Diuretics                                   | 2 (0.7)                         | 2 (1.6)            | 0 (0.0)               | 0.086          |
| Antiplatelet therapy                        | 11 (3.6)                        | 8 (6.5)            | 3 (1.7)               | <b>0.027</b>   |
| Vitamin K antagonist                        | 2 (0.7)                         | 1 (0.8)            | 1 (0.8)               | 0.786          |
| NYHA class I (%)                            | 266 (87.8)                      | 108 (87.8)         | 158 (87.8)            | 0.994          |
| NYHA class II (%)                           | 31 (10.2)                       | 11 (8.9)           | 20 (11.1)             | 0.541          |
| NYHA class III (%)                          | 3 (1)                           | 2 (1.6)            | 1 (0.6)               | 0.355          |
| NYHA class IV (%)                           | 0 (0)                           | 0 (0)              | 0 (0)                 | n.a.           |

|                               |           |           |           |                  |
|-------------------------------|-----------|-----------|-----------|------------------|
| Unrepaired coarctation (%)    | 29 (9.6)  | 9 (7.3)   | 20 (11.1) | 0.270            |
| Ventricular septal defect (%) | 37 (12.2) | 11 (8.9)  | 26 (14.4) | 0.151            |
| Persistent arterial duct (%)  | 17 (5.6)  | 6 (4.9)   | 11 (6.1)  | 0.647            |
| Aortic dilatation >40mm (%)   | 11 (3.6)  | 10 (8.1)  | 1 (0.6)   | <b>0.001</b>     |
| Valve replacement (%)         | 15 (5)    | 8 (6.5)   | 7 (3.9)   | 0.303            |
| Aortic stenosis (%)           | 33 (10.9) | 26 (21.1) | 7 (3.9)   | <b>&lt;0.001</b> |
| Mild                          | 20 (6.6)  | 15 (12.2) | 5 (2.8)   |                  |
| Moderate                      | 13 (4.3)  | 11 (8.9)  | 2 (1.1)   |                  |
| Severe                        | 0 (0)     | 0 (0)     | 0 (0)     |                  |
| Aortic regurgitation (%)      | 62 (17.3) | 33 (26.9) | 19 (10.7) | <b>0.001</b>     |
| Mild                          | 40 (13.3) | 27 (22)   | 13 (7.3)  |                  |
| Moderate                      | 12 (4)    | 6 (4.9)   | 6 (3.4)   |                  |
| Severe                        | 0 (0)     | 0 (0)     | 0 (0)     |                  |
| Mitral stenosis (%)           | 4 (1.3)   | 3 (2.4)   | 1 (0.6)   | 0.162            |
| Mitral regurgitation (%)      | 52 (17.4) | 27 (22.1) | 25 (14)   | 0.060            |
| Mild                          | 47 (15.7) | 26 (21.3) | 21 (11.8) |                  |
| Moderate                      | 5 (1.7)   | 1 (0.8)   | 4 (2.2)   |                  |
| Severe                        | 0 (0)     | 0 (0)     | 0 (0)     |                  |

P-values were calculated between the groups bicuspid aortic valve and no bicuspid aortic valve, using chi-square tests and Mann-Whitney tests where appropriate. BAV: bicuspid aortic valve. IQR: inter-quartile range. BMI: body mass index, in kg/m<sup>2</sup>. LVEF: left ventricular ejection fraction. ACE-inhibitor: angiotensin-converting enzyme inhibitor. NYHA class: New York Heart Association Functional Classification.

**Supplementary table S3** Cardiovascular, obstetric and fetal outcome of women with repaired coarctation versus women with unrepaired coarctation.

|                                                      | <b>Total cohort<br/>(n=303)</b> | <b>Repaired<br/>CoA (n=274)</b> | <b>Unrepaired<br/>CoA (n=29)</b> | <b>P-value</b> |
|------------------------------------------------------|---------------------------------|---------------------------------|----------------------------------|----------------|
| <b>Cardiovascular outcomes</b>                       |                                 |                                 |                                  |                |
| Maternal mortality (%)                               | 0 (0)                           | 0 (0)                           | 0 (0)                            | n.a.           |
| Hospital admission for cardiac reasons (%)           | 23 (7.6)                        | 17 (6.2)                        | 6 (20.7)                         | <b>0.005</b>   |
| Heart failure (%)                                    | 10 (3.3)                        | 9 (3.3)                         | 1 (3.4)                          | 0.963          |
| Hospital admission for uncontrolled hypertension (%) | 8 (2.6)                         | 4 (1.5)                         | 4 (13.8)                         | <b>0.000</b>   |
| Atrial fibrillation or flutter (%)                   | 3 (1)                           | 3 (1.1)                         | 0 (0)                            | 0.571          |
| Ventricular tachyarrhythmias (%)                     | 0 (0)                           | 0 (0)                           | 0 (0)                            | n.a.           |
| Endocarditis (%)                                     | 0 (0)                           | 0 (0)                           | 0 (0)                            | n.a.           |
| Thromboembolic event (%)                             | 0 (0)                           | 0 (0)                           | 0 (0)                            | n.a.           |
| Aortic dissection (%)                                | 0 (0)                           | 0 (0)                           | 0 (0)                            | n.a.           |
| Acute coronary syndrome during pregnancy (%)         | 0 (0)                           | 0 (0)                           | 0 (0)                            | n.a.           |
| Overall MACE (%)                                     | 13 (4.3)                        | 12 (4.4)                        | 1 (3.4)                          | 0.814          |
| <b>Obstetric and fetal outcome</b>                   |                                 |                                 |                                  |                |
| Hypertensive disorders (%)                           | 16 (5.3)                        | 14 (5.1)                        | 2 (12.5)                         | 0.682          |
| Pregnancy-induced hypertension                       | 8 (2.6)                         | 6 (2.2)                         | 2 (6.9)                          | 0.133          |
| Preeclampsia                                         | 8 (2.6)                         | 8 (2.9)                         | 0 (0.0)                          | 0.351          |
| Eclampsia or HELLP                                   | 0 (0)                           | 0 (0)                           | 0 (0)                            | n.a.           |
| Post-partum hemorrhage (%)                           | 5 (1.7)                         | 5 (1.8)                         | 0 (0.0)                          | 0.463          |
| Caesarean section (%)                                | 143 (49.7)                      | 123 (47.3)                      | 20 (71.4)                        | <b>0.015</b>   |

|                             |                |                |                |       |
|-----------------------------|----------------|----------------|----------------|-------|
| Emergency Caesarean section | 31 (10.2)      | 26 (9.5)       | 5 (17.2)       | 0.190 |
| For cardiac reasons         | 7 (2.3)        | 6 (2.2)        | 1 (3.4)        | 0.668 |
| Fetal mortality >24wks (%)  | 1 (0.3)        | 1 (0.4)        | 0 (0.0)        | 0.745 |
| Neonatal mortality (%)      | 4 (1.3)        | 4 (1.5)        | 0 (0.0)        | 0.512 |
| IUGR (%)                    | 12 (4.0)       | 10 (3.5)       | 2 (6.9)        | 0.394 |
| Preterm delivery (%)        | 25 (9.1)       | 21 (8.5)       | 4 (14.3)       | 0.313 |
| Low apgar score <7 (%)      | 15 (5)         | 14 (5.1)       | 1 (3.4)        | 0.695 |
| Low birth weight <2.5kg (%) | 20 (6.6)       | 17 (6.2)       | 3 (10.3)       | 0.393 |
| Mean birth weight (SD)      | 3155.1 (514.4) | 3139.1 (562.4) | 3073.1 (613.1) | 0.639 |

P-values were calculated between the groups repaired and unrepaired coarctation, using chi-square tests and unpaired t-tests where appropriate. CoA: aortic coarctation. MACE: major adverse cardiac event. HELLP: hemolysis, elevated liver enzymes and low platelets syndrome. IUGR: intrauterine growth restriction.

**Supplementary table S4** Cardiovascular, obstetric and fetal outcome of women with bicuspid aortic valve versus women without bicuspid aortic valve.

|                                                      | <b>Overall cohort<br/>(n=303)</b> | <b>BAV<br/>(n=123)</b> | <b>No BAV<br/>(n=180)</b> | <b>P-<br/>value</b> |
|------------------------------------------------------|-----------------------------------|------------------------|---------------------------|---------------------|
| <b>Cardiovascular outcome</b>                        |                                   |                        |                           |                     |
| Maternal mortality (%)                               | 0 (0)                             | 0 (0)                  | 0 (0)                     | n.a.                |
| Hospital admission for cardiac reasons (%)           | 23 (7.6)                          | 7 (5.7)                | 16 (8.9)                  | 0.302               |
| Heart failure (%)                                    | 10 (3.3)                          | 1 (0.8)                | 9 (5.0)                   | <b>0.045</b>        |
| Hospital admission for uncontrolled hypertension (%) | 8 (2.6)                           | 2 (1.6)                | 6 (3.3)                   | 0.363               |
| Atrial fibrillation or flutter (%)                   | 3 (1)                             | 3 (2.4)                | 0 (0)                     | <b>0.035</b>        |
| Ventricular tachyarrhythmias (%)                     | 0 (0)                             | 0 (0)                  | 0 (0)                     | n.a.                |
| Endocarditis (%)                                     | 0 (0)                             | 0 (0)                  | 0 (0)                     | n.a.                |
| Thromboembolic event (%)                             | 0 (0)                             | 0 (0)                  | 0 (0)                     | n.a.                |
| Aortic dissection (%)                                | 0 (0)                             | 0 (0)                  | 0 (0)                     | n.a.                |
| Acute coronary syndrome during pregnancy (%)         | 0 (0)                             | 0 (0)                  | 0 (0)                     | n.a.                |
| Overall MACE (%)                                     | 13 (4.3)                          | 4 (3.3)                | 9 (5.0)                   | 0.461               |
| <b>Obstetric and fetal outcome</b>                   |                                   |                        |                           |                     |
| Hypertensive disorders (%)                           | 16 (5.3)                          | 3 (2.4)                | 13 (7.2)                  | 0.068               |
| Pregnancy-induced hypertension                       | 8 (2.6)                           | 2 (1.6)                | 6 (3.3)                   | 0.363               |
| Preeclampsia                                         | 8 (2.6)                           | 1 (0.8)                | 7 (3.9)                   | 0.101               |
| Eclampsia or HELLP                                   | 0 (0)                             | 0 (0)                  | 0 (0)                     | n.a.                |
| Post-partum hemorrhage (%)                           | 5 (1.7)                           | 3 (2.4)                | 2 (1.1)                   | 0.373               |
| Caesarean section (%)                                | 143 (49.7)                        | 59 (49.6)              | 84 (49.7)                 | 0.983               |

|                             |                |                |               |       |
|-----------------------------|----------------|----------------|---------------|-------|
| Emergency Caesarean section | 31 (10.2)      | 14 (11.4)      | 17 (9.4)      | 0.585 |
| For cardiac reasons         | 7 (2.3)        | 3 (2.4)        | 4 (2.2)       | 0.902 |
| Fetal mortality >24wks (%)  | 1 (0.3)        | 1 (0.8)        | 0 (0)         | 0.226 |
| Neonatal mortality (%)      | 4 (1.3)        | 0 (0)          | 4 (2.2)       | 0.096 |
| IUGR (%)                    | 12 (4.0)       | 3 (2.4)        | 9 (5.0)       | 0.262 |
| Preterm delivery (%)        | 25 (9.1)       | 8 (7.0)        | 17 (10.6)     | 0.297 |
| Low apgar score <7 (%)      | 15 (5)         | 8 (6.5)        | 7 (3.9)       | 0.303 |
| Low birth weight <2.5kg (%) | 20 (6.6)       | 8 (6.5)        | 12 (6.7)      | 0.955 |
| Mean birth weight (SD)      | 3132.8 (566.1) | 3145.6 (502.9) | 31220 (617.1) | 0.776 |

P-values were calculated between the groups bicuspid aortic valve and no bicuspid aortic valve, using chi-square tests and unpaired t-tests where appropriate. BAV: bicuspid aortic valve. MACE: major adverse cardiac event. HELLP: hemolysis, elevated liver enzymes and low platelets syndrome. IUGR: intrauterine growth restriction.



**Supplementary table S5** Type of coarctation correction at time of the pregnancy

|                        | n (%)      |
|------------------------|------------|
| Type known             | 59 (19.5%) |
| <i>Of which</i>        |            |
| End-to-end anastomosis | 16 (27.1%) |
| Stent                  | 16 (27.1%) |
| Balloon angioplasty    | 11 (18.6%) |
| Subclavian flap        | 9 (15.3%)  |
| Dacron patch           | 7 (11.9%)  |

## Appendix

### EORP Oversight Committee

Christopher Peter Gale, Chair, GB, Branko Beleslin, RS, Andrzej Budaj, PL, Ovidiu Chioncel, RO, Nikolaos Dargres, DE, Nicolas Danchin, FR, David Erlinge, SE, Jonathan Emberson, GB, Michael Glikson, IL, Alastair Gray, GB, Meral Kayikcioglu, TR, Aldo Maggioni, IT, Klaudia Vivien Nagy, HU, Aleksandr Nedoshivin, RU, Anna-Sonia Petronio, IT, Jolien Roos-Hesselink, NL, Lars Wallentin, SE, Uwe Zeymer, DE.

### Executive Committee

Roger Hall GB (Co-Chair), Jolien Roos-Hesselink NL (Co-Chair), Joerg Stein, AT, William Anthony Parsonage, AU, Werner Budts, BE, Julie De Backer, BE, Jasmin Grewal, CA, Ariane Marelli, CA, Harald Kaemmerer, DE, Guillaume Jondeau, FR, Mark Johnson, GB, Aldo P. Maggioni, IT, Luigi Tavazzi, IT, Ulf Thilen, SE, Uri Elkayam, US, Catherine Otto, US, Karen Sliwa, ZA.

### ROPAC Investigators

**ARGENTINA** - Buenos Aires: A. Aquieri, A. Saad, H. Ruda Vega, J. Hojman, J.M. Caparros, M. Vazquez Blanco **AUSTRALIA** - Elizabeth Vale: M. Arstall, C.M. Chung, G. Mahadavan, E. Aldridge, M. Wittwer, Y.Y. Chow, Herston: W.A. Parsonage, K. Lust, New Lambton Heights: N. Collins, G. Warner, R. Hatton, A. Gordon, E. Nyman **AUSTRIA** - Innsbruck: J. Stein, E. Donhauser, Vienna: H. Gabriel **AZERBAIJAN** - Baku: A. Bahshaliyev, F. Guliyev, I. Hasanova, T. Jahangirov, Z. Gasimov **BANGLADESH** - Dhaka: A. Salim, C.M. Ahmed, F. Begum, M.H. Hoque, M. Mahmood, M.N. Islam, P.P. Haque, S.K. Banerjee, T. Parveen **BELGIUM** - Brussels: M. Morissens, Gent: J. De Backer, L. Demulier, M. de Hosson, Leuven: W. Budts, M. Beckx **BOSNIA AND HERZEGOVINA** - Banja

Luka: M. Kozic, M. Lovric, T. Kovacevic-Preradovic **BULGARIA** - Sofia: N. Chilingirova, P. Kratunkov **CANADA** - Edmonton: N. Wahab, S. McLean, Hamilton, Ontario: E. Gordon, L. Walter, Montreal: A. Marelli, A. R. Montesclaros **COLOMBIA** - Medellin: G. Monsalve, C. Rodriguez, F. Balthazar, V. Quintero, W. Palacio, L.A. Mejía Cadavid, E. Munoz Ortiz, F. Fortich Hoyos, E. Arevalo Guerrero, J. Gandara Ricardo, J. Velasquez Penagos **CZECH REPUBLIC** - Hradec Kralove: Z. Vavera, Prague: J. Popelova **DENMARK** - Copenhagen: N. Vejlstrop, L. Grønbeck, M. Johansen, A. Ersboll **EGYPT** - Alexandria: Y. Elrakshy, Assiut: K. Eltamawy, M. Gamal Abd-El Aziz, Benha: A. El Nagar, H. Ebaid, H. Abo Elenin, M. Saed, S. Farag, W. Makled, Cairo: K. Sorour, Z. Ashour, G. El-Sayed, M. Abdel Meguid Mahdy, Minia: N. Taha, A. Dardeer, M. Shabaan, Zagazig: A. Saad, M. Ali **FRANCE** - Nice: P. Mocerri, Paris: G. Duthoit, M. Gouton, J. Nizard, L. Baris, S. Cohen, M. Ladouceur, D. Khimoud, B. Iung **GERMANY** - Berlin: F. Berger, A. Olsson, Bonn: U. Gembruch, W.M. Merz, E. Reinert, S. Clade, Y. Kliesch, Essen: C. Wald, Hamburg: C. Sinning, R. Kozlik-Feldmann, S. Blankenberg, E. Zengin-Sahm, G. Mueller, M. Hillebrand, P. Hauck, Y. von Kodolitsch, N. Zarniko, Muenster: H. Baumgartner, R. Schmidt, A. Hellige, Munich: O. Tutarel, H. Kaemmerer, B. Kuschel, N. Nagdyman, Oldenburg: R. Motz **GEORGIA** - Tbilisi: D. Maisuradze **GREECE** - Athens: A. Frogoudaki, E. Iliodromitis, M. Anastasiou-Nana, Marousi, D. Triantafyllis, G. Bekiaris, Thessaloniki: H. Karvounis, G. Giannakoulas, D. Ntiloudi, S.A. Mouratoglou **HUNGARY** - Budapest: A. Temesvari, H. Balint, D. Kohalmi, B. Merkely, C. Liptai, Szeged: A. Nemes, T. Forster, A. Kalapos, K. Berek, K. Havasi, N. Ambrus **INDIA** - Karad: A. Shelke, R. Kawade, S. Patil **INDONESIA** - Bandung: E. Martanto, T.M. Aprami, A. Purnomowati, C.J. Cool, M. Hasan, R. Akbar, S. Hidayat, T.I. Dewi, W. Permadi, D.A. Soedarsono **IRAN** - Tehran: M.M. Ansari-Ramandi, N. Samiei, A. Tabib, F. Kashfi, S. Ansari-Ramandi, S. Rezaei **IRAQ** - Baghdad: H. Ali Farhan, A. Al-Hussein, G. Al-Saedi, G. Mahmood, I.F. Yaseen, L. Al-

Yousuf, M. AlBayati, S. Mahmood, S. Raheem, T. AlHaidari, Z. Dakhil **IRELAND**  
- Dublin: P. Thornton, J. Donnelly, M. Bowen **ISRAEL** - Beer Yakov: A. Blatt, G. Elbaz-Greener, Hadera: A. Shotan, Haifa: S. Yalonetsky, Rehovot: S. Goland, M. Biener **ITALY**  
- Bologna: G. Egidy Assenza, M. Bonvicini, A. Donti, A. Bulgarelli, D. Prandstraller, Bolzano: C. Romeo, R. Crepaz, Brescia: E. Sciatti, M. Metra, R. Orabona, Massa: L. Ait Ali, P. Festa, Milan: V. Fesslova, C. Bonanomi, M. Calcagnino, F. Lombardi, A.M. Colli, M.W. Ossola, C. Gobbi, E. Gherbesi, L. Tondi, M. Schiavone, M. Squillace, Palermo: M.G. Carmina, Torino: A. Maina, C. Macchi, E. Gollo, F.M. Comoglio, N. Montali, P. Re, R. Bordese, T. Todros, V. Donvito, W. Grosso Marra, Trieste: G. Sinagra, B. D'Agata Mottolose, M. Bobbo, V. Gesuete, S. Rakar, F. Ramani **JAPAN** - Chiba: K. Niwa **KAZAKHSTAN** - Almaty: D. Mekebekova, A. Mussagaliyeva, T. Lee **KYRGYZSTAN** - Bishkek: E. Mirrakhimov, S. Abilova, E. Bektasheva, K. Neronova, O. Lunegova **LITHUANIA** - Kaunas: R. Žaliūnas, R. Jonkaitienė, J. Petrauskaitė, Vilnius: A. Laucevicius, D. Jancauskaite, L. Lauciuviene, L. Gumbiene, L. Lankutiene, S. Glaveckaite, M. Laukyte, S. Solovjova, V. Rudiene **MALAYSIA** - Kuala Lumpur: K.H. Chee, C.C-W. Yim, H.L. Ang, R. Kuppusamy, T. Watson **MALTA** - Birkirkara: M. Caruana **NORWAY**  
- Oslo: M-E. Estensen **PAKISTAN** - Rawalpindi: M.G.A. Mahmood Kayani, R. Munir **POLAND** - Bialystok: A. Tomaszuk-Kazberuk, B. Sobkowicz, J. Przepiesc, Krakow: A. Lesniak-Sobelga, L. Tomkiewicz-Pajak, M. Komar, M. Olszowska, P. Podolec, S. Wisniowska-Smialek, Lodz: M. Lelonek, U. Faflik, A. Cichoicka-Radwan, Poznan: K. Plaskota, O. Trojnaraska **PORTUGAL** - Coimbra: N. Guerra, Lisboa: L. de Sousa, Porto: C. Cruz, V. Ribeiro **REPUBLIC OF MACEDONIA** - Skopje: S. Jovanova **ROMANIA**  
- Bucharest: V. Petrescu, R. Jurcut, C. Gingham, I. Mircea Coman, M. Musteata **RUSSIA**  
- Belgorod: O. Osipova, T. Golivets, I. Khamnagadaev, O. Golovchenko, A. Nagibina, I. Ropatko, Izhevsk: I.R. Gaisin, L. Valeryevna Shilina, Moscow: N. Sharashkina, Saint-

Petersburg: E. Shlyakhto, O. Irtyuga, O. Moiseeva, E. Karelkina, I. Zazerskaya, A. Kozlenok, I. Sukhova **SERBIA** - Belgrade: L. Jovovic **SLOVENIA** - Ljubljana: K. Prokšelj, M. Koželj **SOMALILAND** - Hargeisa: A.O. Askar, A.A. Abdilaahi, M.H. Mohamed, A.M. Dirir **SOUTH AFRICA** - Cape Town: K. Sliwa, Houghton: P. Manga **SPAIN** - Barcelona: A. Pijuan-Domenech, L. Galian-Gay, P. Tornos, M.T. Subirana, M. T. Subirana, Bilbao: N. Murga, Madrid: J. M. Oliver, B. Garcia-Aranda Dominguez, I. Hernandez Gonzalez, J.F. Delgado Jimenez, P. Escribano Subias **SUDAN** - Khartoum: A. Elbushi, A. Suliman, K. Jazzar, M. Murtada, N. Ahamed **SWEDEN** - Göteborg: M. Dellborg, E. Furenas, M. Jinesjo, K. Skoglund, P. Eriksson, T. Gilljam, Lund: U. Thilen **SWITZERLAND** - Basel: D. Tobler, Bern: K. Wustmann, F. Schwitz, M. Schwerzmann, Lausanne: T. Rutz, J. Bouchardy, Zurich: M. Greutmann, B.M. Santos Lopes, L. Meier, M. Arrigo **THE NETHERLANDS** - Amsterdam: K. de Boer, T. Konings, Enschede: E. Wajon, L.J. Wagenaar, Geldrop: P. Polak, Groningen: E.PG. Pieper, Rotterdam: J. Roos-Hesselink, L. Baris, I. van Hagen, H. Duvekot, J.M.J. Cornette, The Hague: C. De Groot, Utrecht: C. van Oppen **TURKEY** - Istanbul: L. Sarac, O. Batukan Esen, S. Catirli Enar **UGANDA** - Kampala: C. Mondo, P. Ingabire, B. Nalwanga, T. Semu **UNITED ARAB EMIRATES** - Abu Dhabi: B.T. Salih, W.A.R. Almahmeed, S. Wani, F.S. Mohamed Farook, Al Ain, F. Gerges, A.M. Komaranchath, F. Al bakshi, Dubai: A. Al Mulla, A.H. Yusufali, E.I. Al Hatou, N. Bazargani, F. Hussain **UNITED KINGDOM** - Birmingham: L. Hudsmith, P. Thompson, S. Thorne, S. Bowater, Buckinghamshire: A. Money-Kyrle, P. Clifford, P. Ramrakha, S. Firoozan, J. Chaplin, N. Bowers, Coventry: D. Adamson, London: F. Schroeder, R. Wendler, S. Hammond, P. Nihoyannopoulos, Norwich Norfolk: R. Hall, L. Freeman, Southampton: G. Veldtman, J. Kerr, L. Tellett **UNITED STATES** - Boston: N. Scott, A.B. Bhatt, D. DeFaria Yeh, M.A. Youniss, M. Wood, A.A. Sarma, S. Tsiaras, A. Stefanescu, J.M. Duran, L. Stone, Cleveland: D.S. Majdalany, J. Chapa, Detroit: K. Chintala,

P. Gupta , Hershey, PA: J. Botti, J. Ting, W. R. Davidson, Lexington, Kentucky: G. Wells, D. Sparks, Mineola, NY: V. Paruchuri, K. Marzo, D. Patel, Minneapolis: W. Wagner, S.N. Ahanya, L. Colicchia, T. Jentink, K. Han, M. Loichinger, M. Parker, W. Wagner, C. Longtin, Omaha: A. Yetman, K. Erickson, J. Cramer, S. Tsai, B. Fletcher, S. Warta, Phoenix: C. Cohen, C. Lindblade, R. Puntel, K. Nagaran, N. Croft, Seattle: M. Gurvitz, C. Otto, Stanford, CA: C. Talluto, D. Murphy, M. G. Perlroth
